1 **Machine learning models exploring characteristic single-nucleotide signatures in Yellow**  
2 **Fever Virus**

3  
4 Álvaro Salgado<sup>a#\*</sup>, Raquel C. de Melo-Minardi<sup>b\*</sup>, Marta Giovanetti<sup>a,c\*</sup>, Adriano Veloso<sup>b\*</sup>,  
5 Francielly Morais-Rodrigues<sup>a</sup>, Talita Adelino<sup>d</sup>, Ronaldo de Jesus<sup>e</sup>, Stephane Tosta<sup>a</sup>, Vasco  
6 Azevedo<sup>a</sup>, Jose Lourenço<sup>f#</sup>, Luiz Carlos J. Alcantara<sup>a,c#</sup>

7  
8 <sup>a</sup> Laboratório de Genética Celular e Molecular, Instituto de Ciências Biológicas, Universidade  
9 Federal de Minas Gerais, Belo Horizonte, Minas Gerais, Brazil

10 <sup>b</sup> Departamento de Ciência da Computação, Instituto de Ciências Exatas, Universidade Federal de  
11 Minas Gerais, Belo Horizonte, Minas Gerais, Brazil

12 <sup>c</sup> Laboratório de Flavivírus, Instituto Oswaldo Cruz, Fundação Oswaldo Cruz, Rio de Janeiro,  
13 Brazil

14 <sup>d</sup> Laboratório Central de Saúde Pública, Fundação Ezequiel Dias, Belo Horizonte, Minas Gerais,  
15 Brazil

16 <sup>e</sup> Coordenação Geral dos Laboratórios de Saúde Pública, Secretaria de Vigilância em Saúde,  
17 Ministério da Saúde, Brasília, DF, Brazil

18 <sup>f</sup> Department of Zoology, University of Oxford, Oxford OX1 3PS, UK

19

20 Running Head: Machine learning applied to YFV genomic investigation

21

22 \*These authors contributed equally.

23 #Corresponding authors: Álvaro Salgado, [alvarosalgado@ufmg.br](mailto:alvarosalgado@ufmg.br); Luiz Carlos J Alcantara,  
24 [luiz.alcantara@ioc.fiocruz.br](mailto:luiz.alcantara@ioc.fiocruz.br); Jose Lourenço, [jose.lourenco@zoo.ox.ac.uk](mailto:jose.lourenco@zoo.ox.ac.uk)

## 25 **Abstract**

26 Yellow fever virus (YFV) is the agent of the most severe mosquito-borne disease in the tropics.  
27 Recently, Brazil suffered major YFV outbreaks with a high fatality rate affecting areas where the  
28 virus has not been reported for decades, consisting of urban areas where a large number of  
29 unvaccinated people live. We developed a machine learning framework combining three different  
30 algorithms (XGBoost, random forest and regularized logistic regression). This method was applied  
31 to 56 YFV sequences from human infections and 27 from non-human primate (NHPs) infections  
32 to investigate the presence of genetic signatures possibly related to disease severity (in human  
33 related sequences) and differences in the PCR cycle threshold (Ct) values (in NHP related  
34 sequences). Our analyses reveal four non-synonymous single nucleotide variations (SNVs) on  
35 sequences from human infections, in proteins NS3 (E614D), NS4a (I69V), NS5 (R727G, V643A)  
36 and six non-synonymous SNVs on NHP sequences, in proteins E (L385F), NS1 (A171V), NS3  
37 (I184V) and NS5 (N11S, I374V, E641D). We performed comparative protein structural analysis  
38 on these SNVs, describing possible impacts on protein function. Despite the fact that the dataset  
39 is limited in size and that this study does not consider virus-host interactions, our work highlights  
40 the use of machine learning as a versatile and fast initial approach to genomic data exploration.

41

## 42 **Importance**

43 Yellow fever is responsible for 29-60 thousand deaths annually in South America and Africa and  
44 is the most severe mosquito-borne disease in the tropics. Given the range of clinical outcomes and  
45 the availability of YFV genomic data, the use of machine learning analysis promises to be a  
46 powerful tool in the investigation of genetic signatures that could impact disease severity and its  
47 potential of being reintroduced in an urban transmission cycle. This can assist in the search for  
48 biomarkers of severity as well as help elucidating variations in host's Ct value. This work aims to  
49 propose a relatively fast and inexpensive computational analysis framework, which can be used as  
50 a real-time, initial strategy associated with genomic surveillance to identify a set of single  
51 nucleotide variants putatively related to biological and clinical characteristics being observed.

52

53

## 54 Introduction

55 Yellow fever (YF) is an acute viral hemorrhagic disease endemic in tropical areas of Africa and  
56 Latin America. The causative agent, yellow fever virus (YFV), represents the prototypical member  
57 of the genus *Flavivirus* (family *Flaviviridae*), consisting of a single-stranded, positive-sense RNA  
58 virus, with a genome about 11,000 kb and a single open-reading frame of 10,233 nucleotides (1,  
59 2). Disease varies from nonspecific febrile illness to a fatal hemorrhagic fever. Symptoms usually  
60 appear after an incubation period of three to six days following the bite of an infected mosquito,  
61 with a period of infection lasting several days (2–4). The World Health Organization (WHO)  
62 reports case fatality rates in the order of 15 to 50% (5). Vaccination remains the most effective YF  
63 prevention method, providing lifetime immunity in up to 99% of vaccinated people (6).  
64 Nevertheless, the burden of YF is estimated to be between 84,000 to 170,000 severe cases and  
65 29,000 to 60,000 deaths annually (7, 8), while an estimated 35 million people remain unvaccinated  
66 in areas at risk in Brazil only (9).

67 YFV spreads in two different cycles: sylvatic and urban. The sylvatic transmission cycle occurs in  
68 forested areas, where the virus is endemically transmitted between several non-human primate  
69 (NHP) species. The urban transmission cycle occurs when the virus is introduced into human  
70 populations with high density and urban-dwelling mosquitoes (mainly *Aedes aegypti*) (3). Urban  
71 cycles of YFV transmission have been eradicated in Brazil since 1942 due to vaccination and  
72 vector control campaigns (10–13).

73 In the last decade in Brazil, however, human and NHP epizootic YF cases have been notified at  
74 places beyond the limits of regions previously considered (sylvatic) endemic for the virus (14–17).  
75 The severe impact of these recent outbreaks can be measured, in part, by its fatality rate at around  
76 34%, higher than the general rate estimated by Monath and colleagues (4), motivating the inquiry  
77 as to what could be the possible factors contributing to such a high fatality rate, and if YFV genetic  
78 signatures could be among those factors.

79 Additionally, important findings in recent epidemics (11, 18) show a significant difference in the  
80 distribution of NHP Ct values, in which *Callithrix* spp. exhibit generally higher Ct values than  
81 other NHP species, do not develop fatal YFV infections similar to those reported in humans and  
82 can persist for longer, thus increasing the infectious period. The latter can be an essential factor in  
83 igniting an urban cycle of transmission, mainly due to the genus' proximity to densely urbanized  
84 areas.

85 On this respect, genomic and epidemiological monitoring have become an integral part of the  
86 national (Brazil) and international response to emerging and ongoing epidemics of viral infectious  
87 diseases, allowing the availability of a large amount of genomic data (19–23).

88 In genomic and epidemiological monitoring analysis, machine learning (ML) approaches are  
89 usually applied (24, 25), as described in works that analyze the effectiveness of large scale  
90 genome-wide association studies (GWAS), due to their capability to computationally model the  
91 relationship between combinations of single nucleotide variants, other genetic variations and  
92 environmental factors with observed outcomes (26–28).

93 We curated two different datasets of YFV genomes, one from human cases and the other from  
94 NHP cases. After data curation, the human dataset contained 56 YFV sequences, with 40  
95 sequences related to infections leading to severe outcomes or death, and 16 sequences related to  
96 cases with no severe outcome. We also gathered an NHP (*Callithrix* spp.) dataset, that after  
97 curation contained 27 sequences, of which 21 were related to low Ct values ( $< 20$ ) and 6 were  
98 related to high Ct values ( $\geq 20$ ).

99 We applied three different ML models to each dataset, to guarantee robustness of the ML analysis  
100 (29). We then analysed the models using SHAP (SHapley Additive explanation) (30–32) to  
101 highlight genetic signatures. The possible biological impacts of these signatures were  
102 investigated and discussed by means of in-silico protein structural analysis coupled with literature  
103 review.

104

## 105 **Results**

### 106 **Non-human primates Ct value statistical analysis**

107 Figure 1 shows the distribution of cycle threshold (Ct) values from *Callithrix* spp. sequences, with  
108 two distinct clusters roughly around 12 and 30, with a median value of 26.1. The result of  
109 Hartigan's dip test of unimodality (33) rejected the null hypothesis of a unimodal distribution for  
110 Ct values ( $p < .001$ ), which indicate the existence of two groups of *Callithrix* spp. Ct values.

111

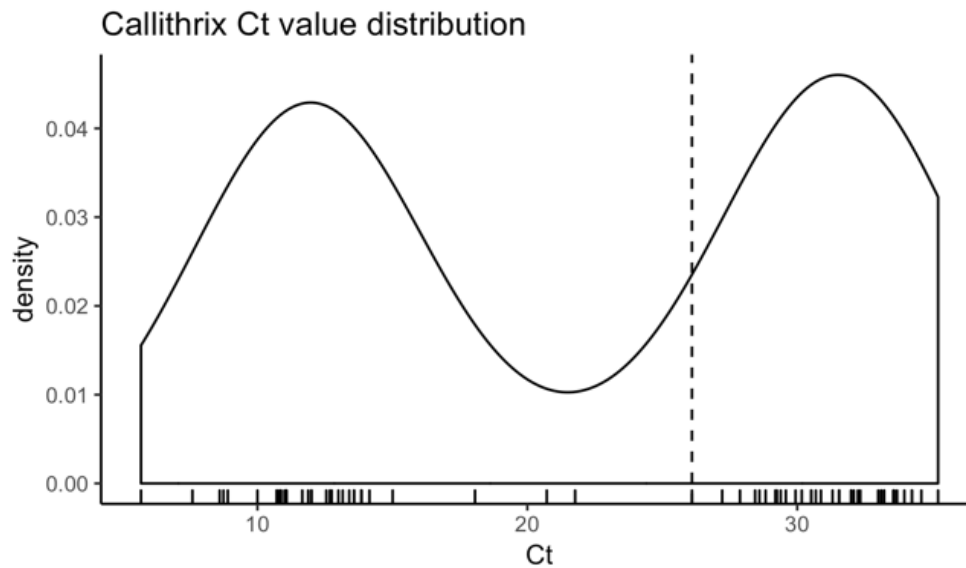

112  
113 Figure 1 – Ct values associated with *Callithrix spp.* sequences. The median value shown by a dashed line. Hartigan’s  
114 dip test of unimodality indicates bimodal distribution ( $p < .001$ ).

115  
116 **Machine learning models’ performance**  
117 Figure 2 shows the confusion matrices for the machine learning models applied. For the human  
118 dataset, the XGBoost classification model achieved an accuracy of 75% on the test set, with F-1  
119 scores of 0.59 and 0.82 for classes 0 (not severe/not death) and 1 (severe/death), respectively. The  
120 random forest model achieved an accuracy of 82% on the test set, with F-1 scores of 0.74 and 0.86  
121 for classes 0 and 1 respectively. The modified logistic regression model achieved an accuracy of  
122 82% on the test set, with F-1 scores of 0.74 and 0.86 for classes 0 and 1, respectively.  
123 For the *Callithrix spp.* dataset, the three models achieved an accuracy of 100% on the test set, with  
124 F-1 scores of 1.00 and 1.00 for classes 0 (low Ct) and 1 (high Ct) respectively.

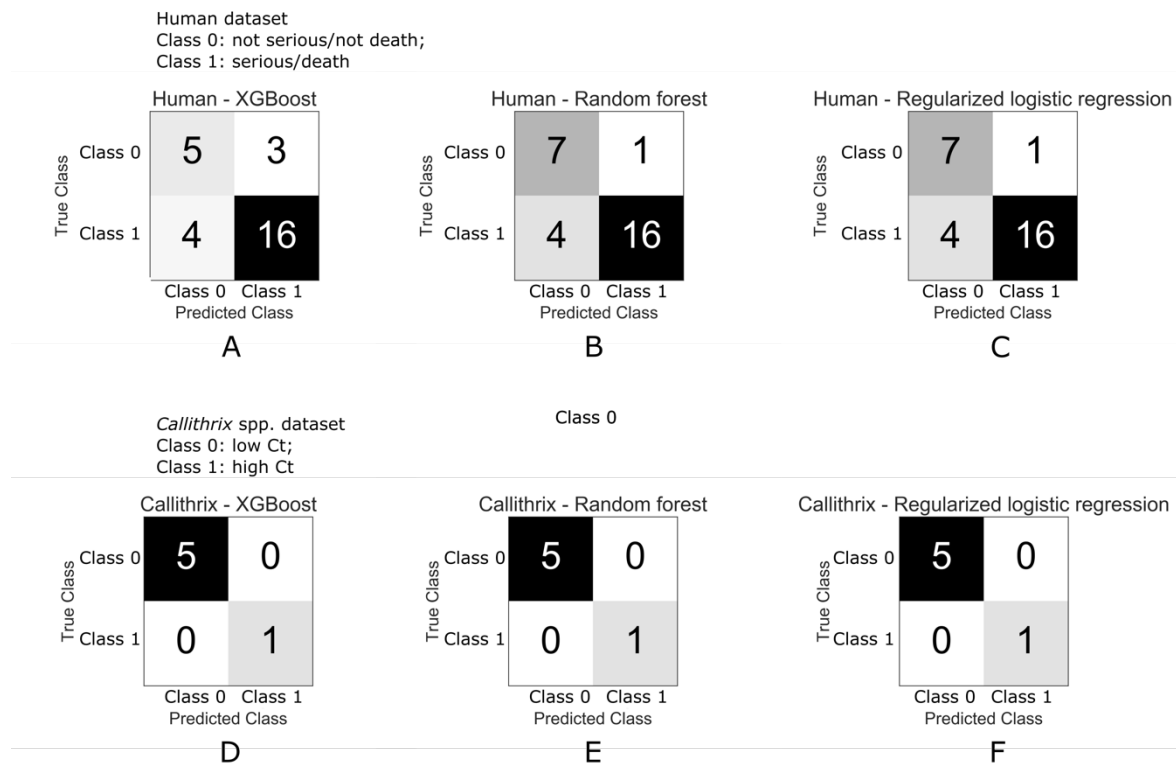

125  
126 Figure 2 - Confusion matrices. Top three figures correspond to human test dataset and the bottom three figures correspond to  
127 *Callithrix spp.* test dataset, for XGBoost, random forest and regularized logistic regression respectively.

128

## 129 YFV genetic signatures

130 *The machine learning methods identified the non-synonymous single nucleotide variants (SNVs) shown in*

131 **Table I.** The table displays each protein where the SNV was found, with nucleotide position on  
132 YFV genome, position relative to the protein's sequence, amino acid position relative to the  
133 translated protein, reference genome amino acid and corresponding codon, analyzed sequences  
134 amino acid variation and corresponding codon and SNV position inside codon (1<sup>st</sup>, 2<sup>nd</sup> or 3<sup>rd</sup>).

135 The results obtained by the analysis of human YFV sequences highlighted 4 SNV positions that  
136 result in the amino acid change, and the results obtained by the analysis of *Callithrix* spp. shows 6  
137 SNV positions that resulted in the amino acid change.

138

139

140 **Table 1 - YFV genetic signatures**

| Human dataset |             |                        |                        |              |                 |              |                 |                              |
|---------------|-------------|------------------------|------------------------|--------------|-----------------|--------------|-----------------|------------------------------|
| Protein       | nn position | nn position on protein | aa position on protein | aa reference | codon reference | aa variation | codon variation | SNV codon position (1, 2, 3) |
| NS3           | 6412        | 1842                   | 614                    | E            | gaa             | D D          | gac gat         | 3                            |
| NS4a          | 6644        | 205                    | 69                     | I            | atc             | V            | gtc             | 1                            |
| NS5           | 9815        | 2179                   | 727                    | R            | agg             | G            | ggg             | 1                            |
| NS5           | 9564        | 1928                   | 643                    | V            | gtt             | A            | gct             | 2                            |
| NHP dataset   |             |                        |                        |              |                 |              |                 |                              |
| Protein       | nn position | nn position on protein | aa position on protein | aa reference | codon reference | aa variation | codon variation | SNV codon position (1, 2, 3) |
| NS5           | 8756        | 1120                   | 374                    | I            | atc             | V            | gtc             | 1                            |
| NS5           | 9559        | 1923                   | 641                    | E            | gaa             | D D          | gac gat         | 3                            |
| NS3           | 5120        | 550                    | 184                    | I            | atc             | V            | gtc             | 1                            |
| E             | 2126        | 1153                   | 385                    | L            | ctc             | F            | ttc             | 1                            |
| NS5           | 7647        | 11                     | 4                      | N            | aat             | S            | agt             | 2                            |
| NS1           | 2964        | 512                    | 171                    | A            | gca             | V            | gta             | 2                            |

141

142

143 **Protein structural analysis**

144 We performed protein structural analysis for all SNVs indicated in



145 Table *I*. The templates, their resolution, the quality of models provided from Swiss-Model (34)  
146 and the changes in binding affinity and stability predicted by mCSM-NA (35) are summarized in  
147

148 **Table 2.**

149

150 **Table 2 - Protein structural analysis results**

| Callithrix spp. Dataset                |                                   |                            |                                |                                    |                                                      |                                    | Human dataset                                        |                                   |                                                     |                                                     |
|----------------------------------------|-----------------------------------|----------------------------|--------------------------------|------------------------------------|------------------------------------------------------|------------------------------------|------------------------------------------------------|-----------------------------------|-----------------------------------------------------|-----------------------------------------------------|
| Protein                                | E                                 | NS1                        | NS3                            | NS5                                |                                                      |                                    | NS3                                                  | NS4a                              | NS5                                                 |                                                     |
| SNV                                    | L385F                             | A171V                      | I184V                          | N11S                               | I374V                                                | E641D                              | E614D                                                | I69V                              | R727G                                               | V643A                                               |
| Template (PDB ID)                      | Template (6WI5) (?)               | Zika virus NS1 (5K6K) (27) | Dengue virus NS3 (5YV8:A) (31) | Yellow fever virus NS5 (6QSN) (32) | Yellow fever virus NS5 (6QSN) (32)                   | Yellow fever virus NS5 (6QSN) (32) | Yellow fever virus NS3 (1YKS) (29)                   | No structure deposited in the PDB | Yellow fever virus NS5 (6QSN) (32)                  | Yellow fever virus NS5(6QSN) (32)                   |
| Resolution                             | 1.83 Å                            | 1.89 Å                     | 2.5 Å                          | 3.00 Å                             | 3.00 Å                                               | 3.00 Å                             | 1.80 Å                                               | -                                 | 3.00 Å                                              | 3.00 Å                                              |
| Coverage (%)                           |                                   | 100%                       | 99%                            |                                    |                                                      |                                    |                                                      | -                                 |                                                     |                                                     |
| Sequence identity                      |                                   | 47.58%                     | 50.57%                         |                                    |                                                      |                                    |                                                      | -                                 |                                                     |                                                     |
| Localization at protein                | Domain III                        | Wing flexible loop         | Linker region                  | MTase domain                       | Palm subdomain                                       | Palm subdomain                     | Helicase domain                                      | -                                 | Thumb subdomain                                     | Palm subdomain                                      |
| Global Model Quality Estimation (GMQE) |                                   | 0.79                       | 0.76                           |                                    |                                                      |                                    |                                                      | -                                 |                                                     |                                                     |
| (Quality mean) QMEAN                   |                                   | -2.5                       | -2.22                          |                                    |                                                      |                                    |                                                      | -                                 |                                                     |                                                     |
| Predicted change in binding affinity   | Target distant from binding sites |                            |                                |                                    | $\Delta\Delta G=0.003$ Kcal/mol (Increased affinity) |                                    | $\Delta\Delta G=0.025$ Kcal/mol (Increased affinity) | -                                 | $\Delta\Delta G=-1.545$ Kcal/mol (Reduced affinity) | $\Delta\Delta G=-0.001$ Kcal/mol (Reduced affinity) |
| Predicted change in stability          |                                   |                            |                                |                                    | -1.908 Kcal/mol (Destabilising)                      |                                    | -0.254 Kcal/mol (Destabilising)                      | -                                 | -0.751 Kcal/mol (Destabilising)                     | -1.884 Kcal/mol (Destabilising)                     |

152 Figure 3 shows the structural representation of proteins E, NS1, NS3 and NS5, with  
153 corresponding SNVs.  
154

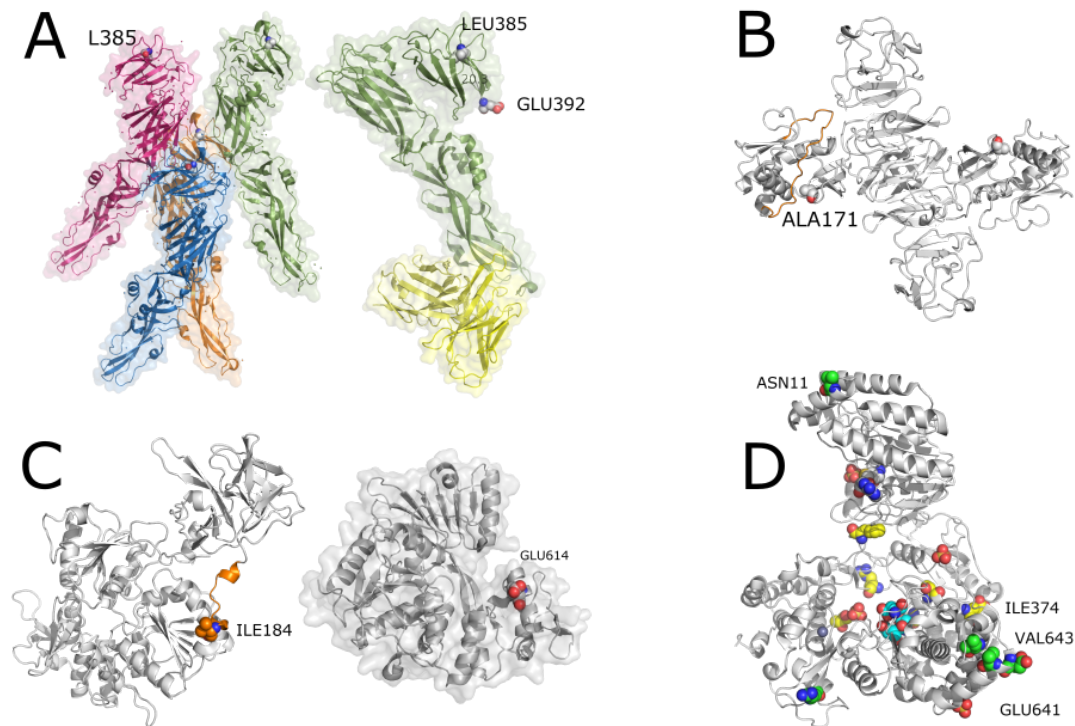

155  
156 Figure 3 - (A) Envelope protein - (A, left) PDB id 6wi5 - tetramer of E protein LEU385 presented in spheres. (A, right) PDB id  
157 6ivz - in green, one chain of protein E and in yellow, the light and heavy chains of monoclonal antibody 5A. Note that the L385F  
158 SNV is distant from both the binding between protein E chains and the antibody recognition site.  
159 (B) NS1 protein. Comparative model built with Swiss-Model and PDB id 5k6k. In orange, we depict the wing flexible loop and in  
160 spheres, SNV ALA171. (C) NS3 protein. (C, left) Comparative model built with Swiss-Model and PDB id 5yvu. In orange, we  
161 depict the interdomain linker region and in spheres, SNV ILE184. (C, right) GLU614 from PDB id 1yks showing that the SNV  
162 E614D is close to the cleft where the DNA binds the NS3 protein. (D) NS5 protein. In green, SNVs. In yellow, important conserved  
163 residues across ZIKV, DENV and WNV. In cyan, active site. In grey, ligand S-adenosyl-L-homocysteine. Sulfate and Zn ions are  
164 also represented in spheres.

165  
166 **E (envelope) protein**  
167 LEU385 (NHP dataset) is far from the intra-chain binding site and the antibody recognition site  
168 (Figure 4-A). LEU385 is in the Domain III (DIII) which has an immunoglobulin C domain (IgC-  
169 like) presenting a seven-stranded fold and is supposed to contain the receptor-binding site. DIII  
170 suffers a rotation and goes closer to the fusion loop (FL), bringing the C-terminal part of DIII  
171 (residue 392) close to FL. LEU385 is 20.3 angstroms far from GLU392.

172 **NS1 protein**

173 The SNV A171V (NHP dataset) is in close contact with a region called *wing flexible loop*  
174 (highlighted in orange in Figure 4-B) and it is also a probable glycosylation site (36).

### 175 **NS3 protein**

176 Although there is a crystallographic structure (PDB id: 1yks) of the helicase domain (37) and  
177 another containing part of NS3 complexed with NS2B (PDB id 6urv) (38) deposited in the PDB,  
178 the referred SNV occurs in the unresolved stretch. The I184V (NHP dataset) is in the linker region  
179 (shown in orange in Figure 4-C, left). It connects protease and helicase domains and corresponds  
180 to sequence KEEGKEELQEIP that encompasses residues between 174 and 185. The SNV E614D  
181 (human dataset) occurs in the helicase domain and is located in the RNA binding cleft, shown in  
182 red on Figure 4-C, right.

### 183 **NS4a protein**

184 Since it has multiple transmembrane hydrophobic segments, structural analysis of NS4a has been  
185 unsuccessful and, so far, there is no structure deposited in the PDB. It is still one of the least  
186 characterized proteins from YFV. It was not possible to obtain a good structural model since the  
187 best template found had a coverage of only 37% and a sequence identity of 25.53%.

### 188 **NS5 protein**

189 There is a recent YFV NS5 structure deposited on PDB (PDB id 6qsn) (39). The analyzed SNVs  
190 (shown in green in Figure 4-D) are N11S, the only SNV in the MTase domain; I374V and E641D,  
191 both located in the palm subdomain. These three SNVs were found on the NHP dataset.  
192 Additionally, SNV V643A, located in the palm, and R727G, in the thumb subdomain, were found  
193 in the human dataset. As depicted in Figure 4-D, they (green) are located far from the Zn and  
194 sulfate ions and the ligand (S-adenosyl-L-homocysteine) (grey). They are not close to any  
195 important / conserved mentioned residue (yellow) that interact with the nucleic acid. SNV I374V  
196 is also present in ZIKV, DENV and WNV. Position E641D varies across other viruses (K, N, R).  
197 Position V643A is also not conserved being an insertion, K or N. Position R727G is S, E or T in  
198 other flaviviruses.

199

### 200 **Discussion**

201 In this study, we demonstrate the potential of applying ML approaches on real-time genomic  
202 surveillance, to quickly identify genetic loci which may be of public health interest.

203 We find signals in multiple genetic loci and present a structural-based review on the potential  
204 impact of changes at those loci. However, the limited number of sequences analyzed demands  
205 caution when presenting the results. A large number of high-quality sequences is ideal for the  
206 application of ML analysis, especially when dealing with viruses, whose high mutation rates tend  
207 to insert many variations on its genomes. Furthermore, our analysis didn't consider virus-host  
208 interactions, such as host genome or immune system and pre-existing health conditions. In this  
209 regard, efficient host data collection, such as Electronic Health Records (EHR), are of paramount  
210 importance for a thorough investigation of clinical outcomes.

211 The envelope (E) protein is related to virus attachment and fusion (40). NHP dataset analysis shows  
212 SNV L395F on Domain III, a region containing an IgC-like domain and supposed to contain a  
213 receptor-binding site crucial for virion maturation (41). It is possible that this SNV could have an  
214 impact on the plasticity of this domain and affect the virus' receptor-binding site and it would be  
215 interesting to investigate this behaviour through simulations of molecular dynamics in future work.

216 NS1 protein is a crucial non-structural protein (36). We found a non-synonymous SNV (A171V)  
217 on NHP dataset, located near a highly flexible region on the protein, called the *wing flexible loop*,  
218 which is a probable glycosylation site (GS) (42). NS1 is also a key protein secreted by infected  
219 cells, which has the potential to interact with the adaptive immune system responses (36). In  
220 dengue infections, NS1 is known to modulate capillary leakage in severe disease and may thus  
221 have a role to play in the severity of YFV infection (43).

222 NS3 protein, which is composed of protease and helicase domains, has functions related to viral  
223 polyprotein processing and cleavage, viral genome replication and RNA capping (40). SNV  
224 I184V, found on NHP dataset, is in a region with probable limited functional constraints (44). SNV  
225 E614D, found on the human dataset, occurs in the NS3 helicase domain and is located in the RNA  
226 binding cleft. ASP and GLU are both negatively charged amino acids, but ASP has a shorter side  
227 chain which can cause it to lose access to the ligand. We used mCSM-NA (35) to evaluate the  
228 impact of the SNV on stability and affinity with RNA, showing a small destabilizing effect on the  
229 interaction with RNA (-0.646 Kcal/mol), which could have an impact on its function, fundamental  
230 to viral genome replication. Unfortunately, there are no structures in complex with RNA available.  
231 Models built with protein-RNA docking techniques could help elucidate if there is a significant  
232 impact of this SNV on RNA interaction.

233 We found one SNV on the NS4a protein (I69V, human dataset). However, a lack of current  
234 knowledge on YFV NS4a impeded us from further exploring the possible role of I69V in human

235 hosts. Based on the protein's proposed functions (45–47), this SNV could, in principle, affect viral  
236 replication, but such hypothesis would have to be tested by non-computational means.

237 As an outlier, NS5 had the highest number of identified variations - I374V, E641D, N11S, R727G,  
238 V643A - from both human and NHP YFV sequences. NS5 protein is a fundamental enzyme for  
239 viral replication because it contains an N-terminal methyltransferase domain (MTase) and a C-  
240 terminal RNA dependent RNA polymerase domain (RdRp) (48). MTase domain has important  
241 functions involved in protecting viral RNA from degradation and innate immunity response. RdRp  
242 is essential for viral RNA replication, because its activities cannot be performed by host  
243 polymerases, and is a promising target for antiviral drug development (49). Furthermore, dengue  
244 virus NS5 has been associated with immune response evasion (50). With the structural analyses,  
245 we found that none of the SNVs found has been reported to be in positions with apparent  
246 connections to protein function or structure. However, R727G on the human dataset, on the thumb  
247 subdomain of RdRp domain, shows a change in predicted affinity for RNA upon SNV occurrence.  
248 This reduction in affinity could impact polymerase function and viral replication efficiency.

249 In conclusion, even though the method proposed was applied on data that was already available  
250 from other sources, our study demonstrate that it is efficient and easy to replicate, making it  
251 suitable for real-time genomic surveillance, in which genetic data is analyzed as it is generated.  
252 This approach may help detect and inform on possible connections between ongoing genetic  
253 changes and public health in a timely manner.

254

## 255 **Materials and Methods**

### 256 **Datasets**

257 We retrieved YFV complete or near complete genome sequences from the recent Brazilian  
258 outbreaks, available on public databases (19–23), with associated epidemiological and clinical data  
259 containing relevant information regarding clinical severity and outcome for human infections  
260 samples, as well as PCR cycle threshold value (Ct) for both human and NHP samples. The  
261 alignment was made using MAFFT online (51) and was manually verified and corrected using  
262 AliView (<https://ormbunkar.se/aliview/>). Sequences with coverage lower than 90% were removed  
263 from the study. For ML analysis, human infection sequences were divided between not severe/not  
264 death and severe/death. *Callithrix* ssp. infection sequences were divided by low Ct (<20) and high  
265 Ct ( $\geq 20$ ). After curation, the human dataset contained 56 YFV sequences, with 40 sequences  
266 related to severe/death cases, and 16 sequences related to not severe/not death cases. The NHP

267 (*Callithrix* spp.) dataset, after curation, contained 27 sequences, of which 21 were related to low  
268 Ct values (< 20) and 6 were related to high Ct values ( $\geq$  20).

### 269 **Machine learning model adjustment**

270 We applied three different ML models for each of two analyzed datasets, XGBoost (52, 53),  
271 random forest (54) and regularized logistic regression (55). We adjusted the XGBoost model  
272 parameters in a “grid-search cross-validation” scheme with five folds. Random forest adjustment  
273 used “out of bag” data as validation. Regularized logistic regression parameters were adjusted on  
274 a 10-fold cross-validation scheme, using their averages in the final model.

### 275 **Model interpretation**

276 Feature importance was computed using SHAP (SHapley Additive exPlanation) (30–32). We  
277 followed the author’s suggestion (<https://github.com/slundberg/shap/issues/397>) on dealing with  
278 categorical data when using SHAP.

### 279 **Protein structural analysis**

280 We searched on Protein Data Bank (PDB) (56) for experimentally resolved structures. For those  
281 proteins that did not have structures, we looked for templates for comparative modeling with at  
282 least 30% identity. The comparative models were built with the Swiss-Model server (57). We used  
283 mCSM (35) method to predict the impact of SNVs on protein stability and interactions.

284

### 285 **Acknowledgements**

286 This work was supported by Decit, SCTIE, Brazilian Ministry of Health, Conselho Nacional de  
287 Desenvolvimento Científico - CNPq - (440685/2016-8 and 440856/2016-7), Coordenação de  
288 Aperfeiçoamento de Pessoal de Nível Superior - CAPES (88887.130716/2016-00,  
289 88881.130825/2016-00 and 88887.130823/2016-00), by the European Union’s Horizon 2020  
290 Research and Innovation Programme under ZIKAlliance Grant Agreement No. 734548.

291

292



## References

1. Chambers TJ, Hahn CS, Galler R, Rice CM. 1990. Flavivirus genome organization, expression, and replication. *Annu Rev Microbiol* 44:649–688.
2. Monath TP. 2001. Yellow fever: an update. *Lancet Infect Dis* 1:11–20.
3. Gardner CL, Ryman KD. 2010. Yellow Fever: A Reemerging Threat. *Clinics in Laboratory Medicine* 30:237–260.
4. Monath TP. 2008. Treatment of yellow fever. *Antiviral Research* 78:116–124.
5. 2015. WHO Report on Global Surveillance of Epidemic-prone Infectious Diseases - Yellow fever. World Health Organization. World Health Organization.
6. 2020. Yellow Fever. Pan American Health Organization / World Health Organization.
7. Paules CI, Fauci AS. 2017. Yellow Fever — Once Again on the Radar Screen in the Americas. *New England Journal of Medicine* 376:1397–1399.
8. 2019. Yellow fever. World Health Organization.
9. Shearer FM, Moyes CL, Pigott DM, Brady OJ, Marinho F, Deshpande A, Longbottom J, Browne AJ, Kraemer MU, O'Reilly KM, others. 2017. Global yellow fever vaccination coverage from 1970 to 2016: an adjusted retrospective analysis. *The Lancet infectious diseases* 17:1209–1217.
10. Consoli RA, de Oliveira RL. 1994. Principais mosquitos de importância sanitária no Brasil. SciELO-Editora FIOCRUZ.
11. Mares-Guia MAM de M, Horta MA, Romano A, Rodrigues CDS, Mendonça MCL, dos Santos CC, Torres MC, Araujo ESM, Fabri A, de Souza ER, Ribeiro ROR, Lucena FP, Junior

- LCA, da Cunha RV, Nogueira RMR, Sequeira PC, de Filippis AMB. 2020. Yellow fever epizootics in non-human primates, Southeast and Northeast Brazil (2017 and 2018). *Parasites & Vectors* 13.
12. 2017. Yellow fever, the return of an old threat. Fiocruz.
  13. Vasconcelos PF da C. 2010. Yellow fever in Brazil: thoughts and hypotheses on the emergence in previously free areas. *Revista de Saúde Pública* 44:1144–1149.
  14. Delatorre E, Abreu FVS de, Ribeiro IP, Gómez MM, dos Santos AAC, Ferreira-de-Brito A, Neves MSAS, Bonelly I, de Miranda RM, Furtado ND, Raphael LMS, da Silva L de FF, de Castro MG, Ramos DG, Romano APM, Kallás EG, Vicente ACP, Bello G, Lourenço-de-Oliveira R, Bonaldo MC. 2019. Distinct YFV Lineages Co-circulated in the Central-Western and Southeastern Brazilian Regions From 2015 to 2018. *Front Microbiol* 10.
  15. DIVE - Boletim Epidemiológico nº 06/2020 Situação epidemiológica da Febre Amarela em Santa Catarina (Atualizado em 10/06/2020).
  16. Boletim epidemiológico da Febre Amarela no Brasil 2019/2020 | RETS - Rede Internacional de Educação de Técnicos em Saúde.
  17. 2020. Febre Amarela | Secretaria da Saúde.
  18. Cunha MS, da Costa AC, de Azevedo Fernandes NCC, Guerra JM, dos Santos FCP, Nogueira JS, D'Agostino LG, Komninakis SV, Witkin SS, Ressio RA, Maeda AY, Vasami FGS, Kaigawa UMA, de Azevedo LS, de Souza Facioli PA, Macedo FLL, Sabino EC, Leal É, de Souza RP. 2019. Epizootics due to Yellow Fever Virus in São Paulo State, Brazil: viral dissemination to new areas (2016–2017). *Scientific Reports* 9:5474.

19. Cunha M dos P, Duarte-Neto AN, Pour SZ, Ortiz-Baez AS, Černý J, Pereira BB de S, Braconi CT, Ho Y-L, Perondi B, Sztajn bok J, Alves VAF, Dolhnikoff M, Holmes EC, Saldiva PHN, Zanotto PM de A. 2019. Origin of the São Paulo Yellow Fever epidemic of 2017–2018 revealed through molecular epidemiological analysis of fatal cases. *Scientific Reports* 9.
20. Faria NR, Kraemer MUG, Hill SC, Jesus JG de, Aguiar RS, Iani FCM, Xavier J, Quick J, Plessis L du, Dellicour S, Thézé J, Carvalho RDO, Baele G, Wu C-H, Silveira PP, Arruda MB, Pereira MA, Pereira GC, Lourenço J, Obolski U, Abade L, Vasylyeva TI, Giovanetti M, Yi D, Weiss DJ, Wint GRW, Shearer FM, Funk S, Nikolay B, Fonseca V, Adelino TER, Oliveira M a. A, Silva MVF, Sacchetto L, Figueiredo PO, Rezende IM, Mello EM, Said RFC, Santos DA, Ferraz ML, Brito MG, Santana LF, Menezes MT, Brindeiro RM, Tanuri A, Santos FCP dos, Cunha MS, Nogueira JS, Rocco IM, Costa AC da, Komninakis SCV, Azevedo V, Chieppe AO, Araujo ESM, Mendonça MCL, Santos CC dos, Santos CD dos, Mares-Guia AM, Nogueira RMR, Sequeira PC, Abreu RG, Garcia MHO, Abreu AL, Okumoto O, Kroon EG, Albuquerque CFC de, Lewandowski K, Pullan ST, Carroll M, Oliveira T de, Sabino EC, Souza RP, Suchard MA, Lemey P, Trindade GS, Drumond BP, Filippis AMB, Loman NJ, Cauchemez S, Alcantara LCJ, Pybus OG. 2018. Genomic and epidemiological monitoring of yellow fever virus transmission potential. *Science* 361:894–899.
21. Giovanetti M, de Mendonça MCL, Fonseca V, Mares-Guia MA, Fabri A, Xavier J, de Jesus JG, Gräf T, dos Santos Rodrigues CD, dos Santos CC, Sampaio SA, Chalhoub FLL, de Bruycker Nogueira F, Theze J, Romano APM, Ramos DG, de Abreu AL, Oliveira WK, do Carmo Said RF, de Alburque CFC, de Oliveira T, Fernandes CA, Aguiar SF, Chieppe A, Sequeira PC, Faria NR, Cunha RV, Alcantara LCJ, de Filippis AMB. 2019. Yellow Fever Virus Reemergence and Spread in Southeast Brazil, 2016–2019. *Journal of Virology* 94.

22. Goes de Jesus J, Gräf T, Giovanetti M, Mares-Guia MA, Xavier J, Lima Maia M, Fonseca V, Fabri A, dos Santos RF, Mota Pereira F, Ferraz Oliveira Santos L, Reboredo de Oliveira da Silva L, Pereira Gusmão Maia Z, Gomes Cerqueira JX, Thèze J, Abade L, Cordeiro M de CS, Torquato SSC, Santana EB, de Jesus Silva NS, Dourado RSO, Alves AB, do Socorro Guedes A, da Silva Filho PM, Rodrigues Faria N, de Albuquerque CFC, de Abreu AL, Martins Romano AP, Croda J, do Carmo Said RF, Cunha GM, da Fonseca Cerqueira JM, Mello AL e S de, de Filippis AMB, Alcantara LCJ. 2020. Yellow fever transmission in non-human primates, Bahia, Northeastern Brazil. *PLOS Neglected Tropical Diseases* 14:e0008405.
23. Hill SC, de Souza R, Thézé J, Claro I, Aguiar RS, Abade L, Santos FCP, Cunha MS, Nogueira JS, Salles FCS, Rocco IM, Maeda AY, Vasami FGS, du Plessis L, Silveira PP, de Jesus JG, Quick J, Fernandes NCCA, Guerra JM, Réssio RA, Giovanetti M, Alcantara LCJ, Cirqueira CS, Díaz-Delgado J, Macedo FLL, Timenetsky M do CST, de Paula R, Spinola R, Telles de Deus J, Mucci LF, Tubaki RM, de Menezes RMT, Ramos PL, de Abreu AL, Cruz LN, Loman N, Dellicour S, Pybus OG, Sabino EC, Faria NR. 2020. Genomic Surveillance of Yellow Fever Virus Epizootic in São Paulo, Brazil, 2016 – 2018. *PLOS Pathogens* 16:e1008699.
24. Chen X, Ishwaran H. 2012. Random forests for genomic data analysis. *Genomics* 99:323–329.
25. Ishwaran H, Kogalur UB, Gorodeski EZ, Minn AJ, Lauer MS. 2010. High-Dimensional Variable Selection for Survival Data. *Journal of the American Statistical Association* 105:205–217.
26. Behravan H, Hartikainen JM, Tengström M, Pylkäs K, Winqvist R, Kosma V, Mannermaa A. 2018. Machine learning identifies interacting genetic variants contributing to breast cancer risk: A case study in Finnish cases and controls. *Scientific Reports* 8.

27. Ho DSW, Schierding W, Wake M, Saffery R, O'Sullivan J. 2019. Machine Learning SNP Based Prediction for Precision Medicine. *Frontiers in Genetics* 10.
28. Moore JH, Asselbergs FW, Williams SM. 2010. Bioinformatics challenges for genome-wide association studies. *Bioinformatics* 26:445–455.
29. Wolpert DH. 1996. The Lack of A Priori Distinctions Between Learning Algorithms. *Neural Computation* 8:1341–1390.
30. Lundberg S, Lee S-I. 2017. A Unified Approach to Interpreting Model Predictions. arXiv:170507874 [cs, stat].
31. Lundberg SM, Lee S-I. 2018. Consistent feature attribution for tree ensembles. arXiv:170606060 [cs, stat].
32. Lundberg SM, Nair B, Vavilala MS, Horibe M, Eisses MJ, Adams T, Liston DE, Low DK-W, Newman S-F, Kim J, Lee S-I. 2018. Explainable machine-learning predictions for the prevention of hypoxaemia during surgery. *Nature Biomedical Engineering* 2:749–760.
33. Hartigan JA, Hartigan PM. 1985. The Dip Test of Unimodality. *Ann Statist* 13:70–84.
34. Arnold K, Bordoli L, Kopp J, Schwede T. 2006. The SWISS-MODEL workspace: a web-based environment for protein structure homology modelling. *Bioinformatics* 22:195–201.
35. Pires DEV, Ascher DB. 2017. mCSM-NA: predicting the effects of mutations on protein-nucleic acids interactions. *Nucleic Acids Res* 45:W241–W246.
36. Brown WC, Akey DL, Konwerski J, Tarrasch JT, Skiniotis G, Kuhn RJ, Smith JL. 2016. Extended Surface for Membrane Association in Zika Virus NS1 Structure. *Nat Struct Mol Biol* 23:865–867.

37. Wu J, Bera AK, Kuhn RJ, Smith JL. 2005. Structure of the Flavivirus Helicase: Implications for Catalytic Activity, Protein Interactions, and Proteolytic Processing. *J Virol* 79:10268–10277.
38. Noske GD, Gawriljuk VO, Fernandes RS, Furtado ND, Bonaldo MC, Oliva G, Godoy AS. 2020. Structural characterization and polymorphism analysis of the NS2B-NS3 protease from the 2017 Brazilian circulating strain of Yellow Fever virus. *Biochim Biophys Acta Gen Subj* 1864:129521.
39. Dubankova A, Boura E. 2019. Structure of the yellow fever NS5 protein reveals conserved drug targets shared among flaviviruses. *Antiviral Research* 169:104536.
40. Barrows NJ, Campos RK, Liao K-C, Prasanth KR, Soto-Acosta R, Yeh S-C, Schott-Lerner G, Pompon J, Sessions OM, Bradrick SS, Garcia-Blanco MA. 2018. Biochemistry and Molecular Biology of Flaviviruses. *Chemical Reviews* 118:4448–4482.
41. Lu X, Xiao H, Li S, Pang X, Song J, Liu S, Cheng H, Li Y, Wang X, Huang C, Guo T, ter Meulen J, Daffis S, Yan J, Dai L, Rao Z, Klenk H-D, Qi J, Shi Y, Gao GF. 2019. Double Lock of a Human Neutralizing and Protective Monoclonal Antibody Targeting the Yellow Fever Virus Envelope. *Cell Reports* 26:438-446.e5.
42. Watanabe Y, Bowden TA, Wilson IA, Crispin M. 2019. Exploitation of glycosylation in enveloped virus pathobiology. *Biochimica et Biophysica Acta (BBA) - General Subjects* 1863:1480–1497.
43. Puerta-Guardo H, Glasner DR, Harris E. 2016. Dengue Virus NS1 Disrupts the Endothelial Glycocalyx, Leading to Hyperpermeability. *PLOS Pathogens* 12:e1005738.

44. Luo D, Xu T, Hunke C, Grüber G, Vasudevan SG, Lescar J. 2008. Crystal Structure of the NS3 Protease-Helicase from Dengue Virus. *Journal of Virology* 82:173–183.
45. Zou J, Xie X, Wang Q-Y, Dong H, Lee MY, Kang C, Yuan Z, Shi P-Y. 2015. Characterization of Dengue Virus NS4A and NS4B Protein Interaction. *Journal of Virology* 89:3455–3470.
46. Miller S, Kastner S, Krijnse-Locker J, Bühler S, Bartenschlager R. 2007. The non-structural protein 4A of dengue virus is an integral membrane protein inducing membrane alterations in a 2K-regulated manner. *J Biol Chem* 282:8873–8882.
47. Lin M-H, Hsu H-J, Bartenschlager R, Fischer WB. 2014. Membrane undulation induced by NS4A of Dengue virus: a molecular dynamics simulation study. *Journal of Biomolecular Structure and Dynamics* 32:1552–1562.
48. El Sahili A, Lescar J. 2017. Dengue Virus Non-Structural Protein 5. *Viruses* 9.
49. Zhu W, Chen CZ, Gorshkov K, Xu M, Lo DC, Zheng W. 2020. RNA-Dependent RNA Polymerase as a Target for COVID-19 Drug Discovery. *SLAS DISCOVERY: Advancing the Science of Drug Discovery* 247255522094212.
50. Ashour J, Laurent-Rolle M, Shi P-Y, García-Sastre A. 2009. NS5 of Dengue Virus Mediates STAT2 Binding and Degradation. *J Virol* 83:5408–5418.
51. Katoh K, Rozewicki J, Yamada KD. 2019. MAFFT online service: multiple sequence alignment, interactive sequence choice and visualization. *Briefings in Bioinformatics* 20:1160–1166.
52. Friedman JH. 2001. Greedy Function Approximation: A Gradient Boosting Machine. *The Annals of Statistics* 29:1189–1232.

53. Schapire RE. 2003. The Boosting Approach to Machine Learning: An Overview, p. 149–171. *In* Denison, DD, Hansen, MH, Holmes, CC, Mallick, B, Yu, B (eds.), *Nonlinear Estimation and Classification*. Springer New York, New York, NY.
54. Breiman L. 2001. Random forests. *Machine learning* 45:5–32.
55. Morais-Rodrigues F, Silvério-Machado R, Kato RB, Rodrigues DLN, Valdez-Baez J, Fonseca V, San EJ, Gomes LGR, dos Santos RG, Vinicius Canário Viana M, da Cruz Ferraz Dutra J, Teixeira Dornelles Parise M, Parise D, Campos FF, de Souza SJ, Ortega JM, Barh D, Ghosh P, Azevedo VAC, dos Santos MA. 2020. Analysis of the microarray gene expression for breast cancer progression after the application modified logistic regression. *Gene* 726:144168.
56. Goodsell DS, Zardecki C, Di Costanzo L, Duarte JM, Hudson BP, Persikova I, Segura J, Shao C, Voigt M, Westbrook JD, Young JY, Burley SK. 2020. RCSB Protein Data Bank: Enabling biomedical research and drug discovery. *Protein Sci* 29:52–65.
57. Schwede T, Kopp J, Guex N, Peitsch MC. 2003. SWISS-MODEL: an automated protein homology-modeling server. *Nucleic Acids Res* 31:3381–3385.
